# Supplementary material for: Human bone marrow assessment by single-cell RNA sequencing, mass cytometry, and flow cytometry
Source: JCI journal article supplement (doi:10.1172/jci.insight.124928), 2018-12-05
Supplement: sd1 [file 1]

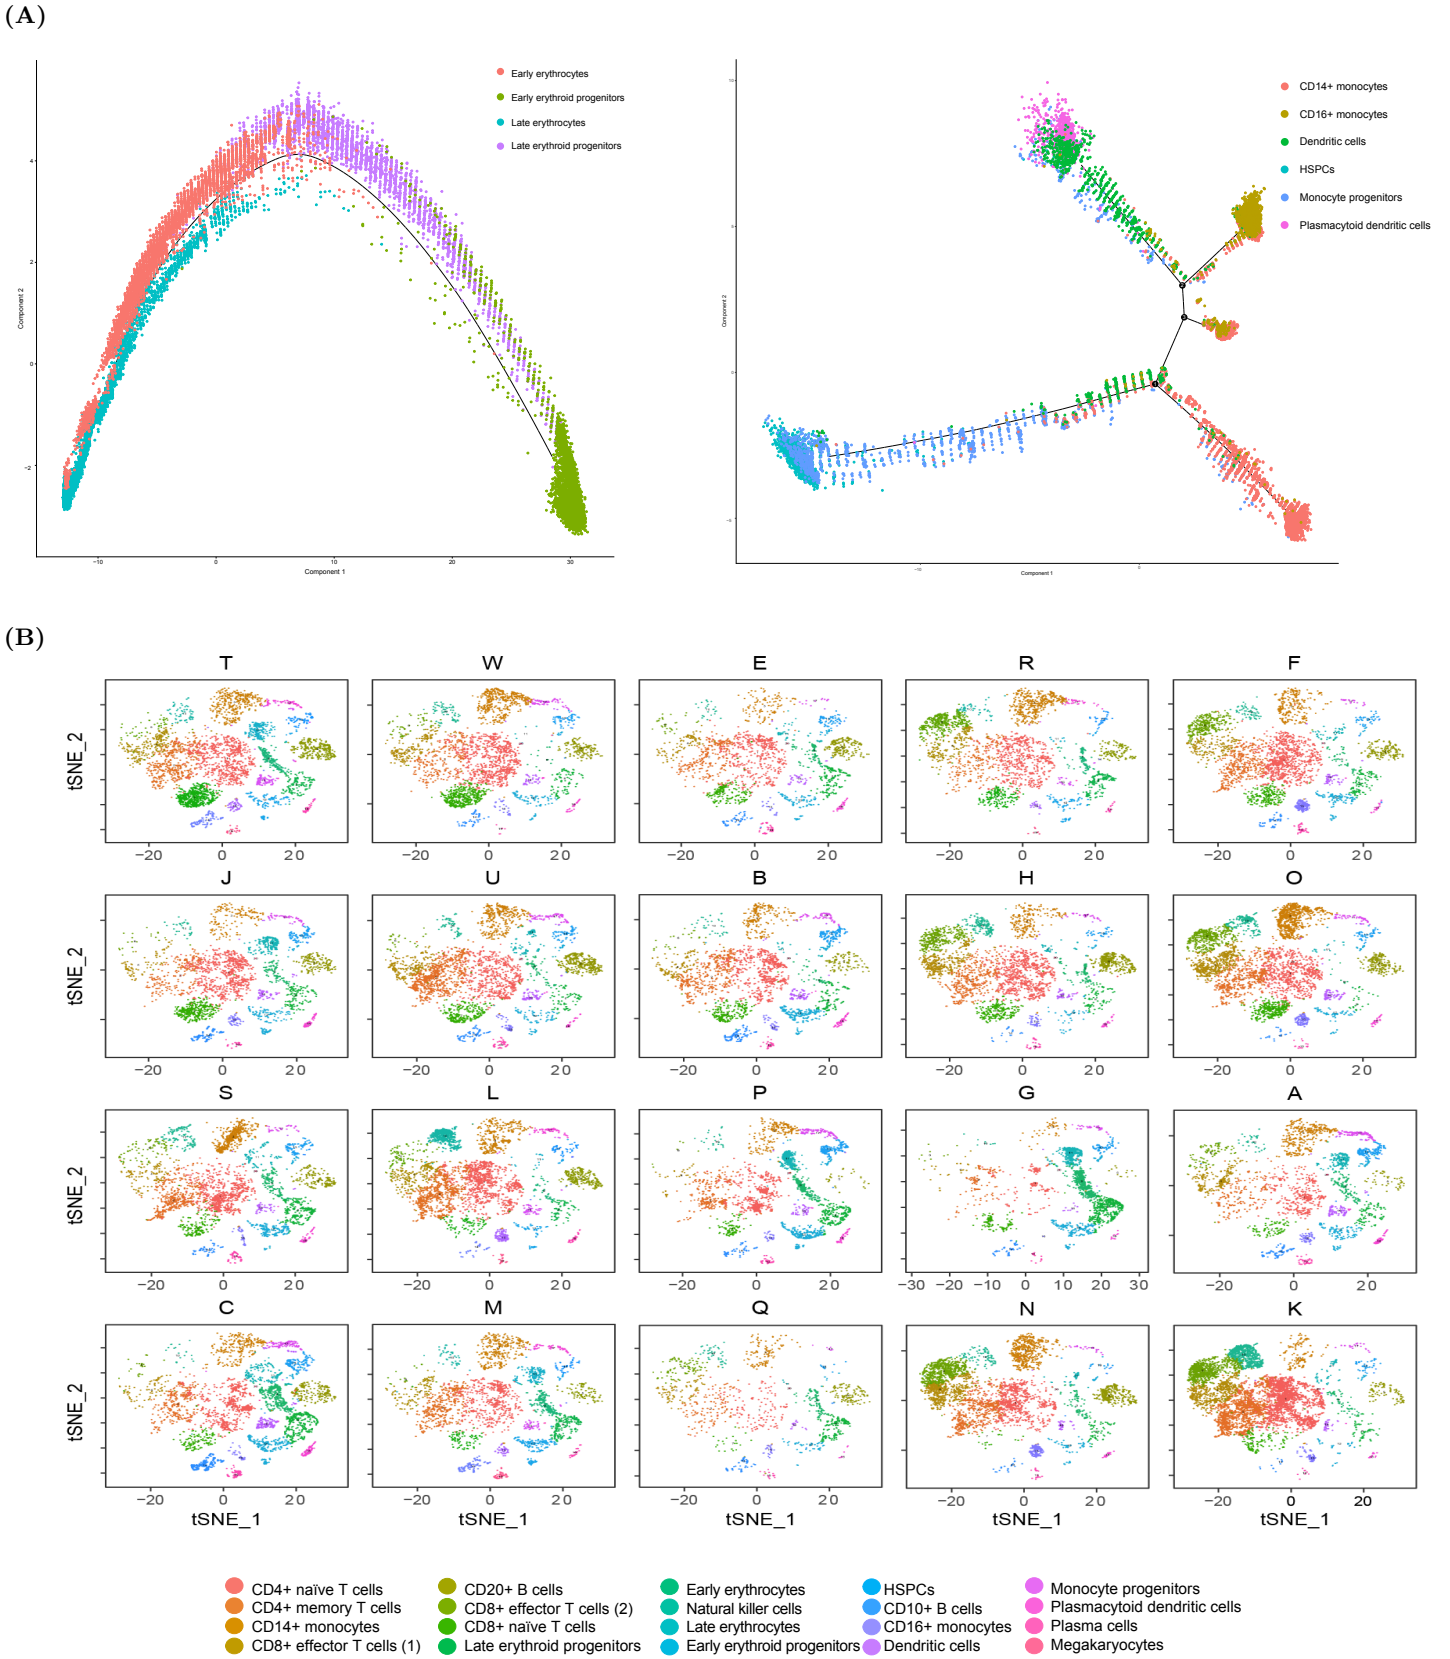

(A)

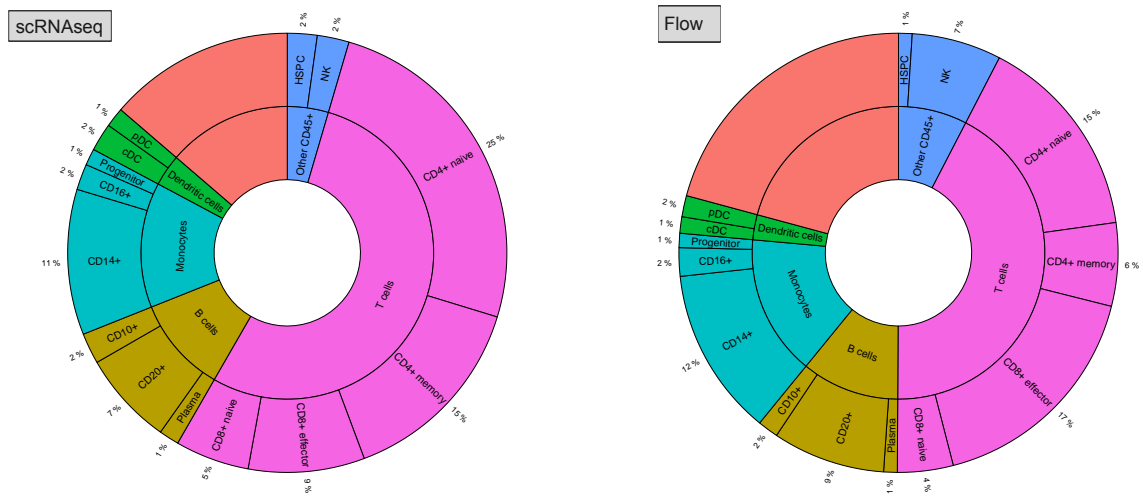

(B)

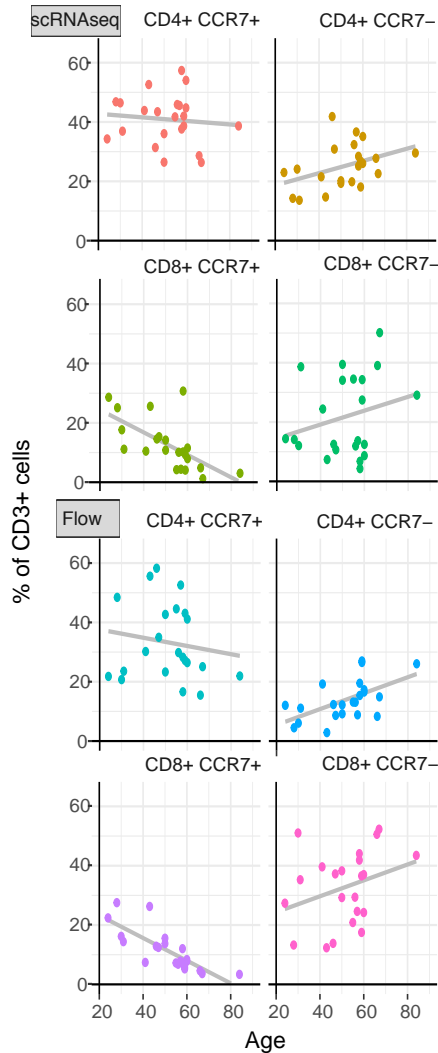

(C)

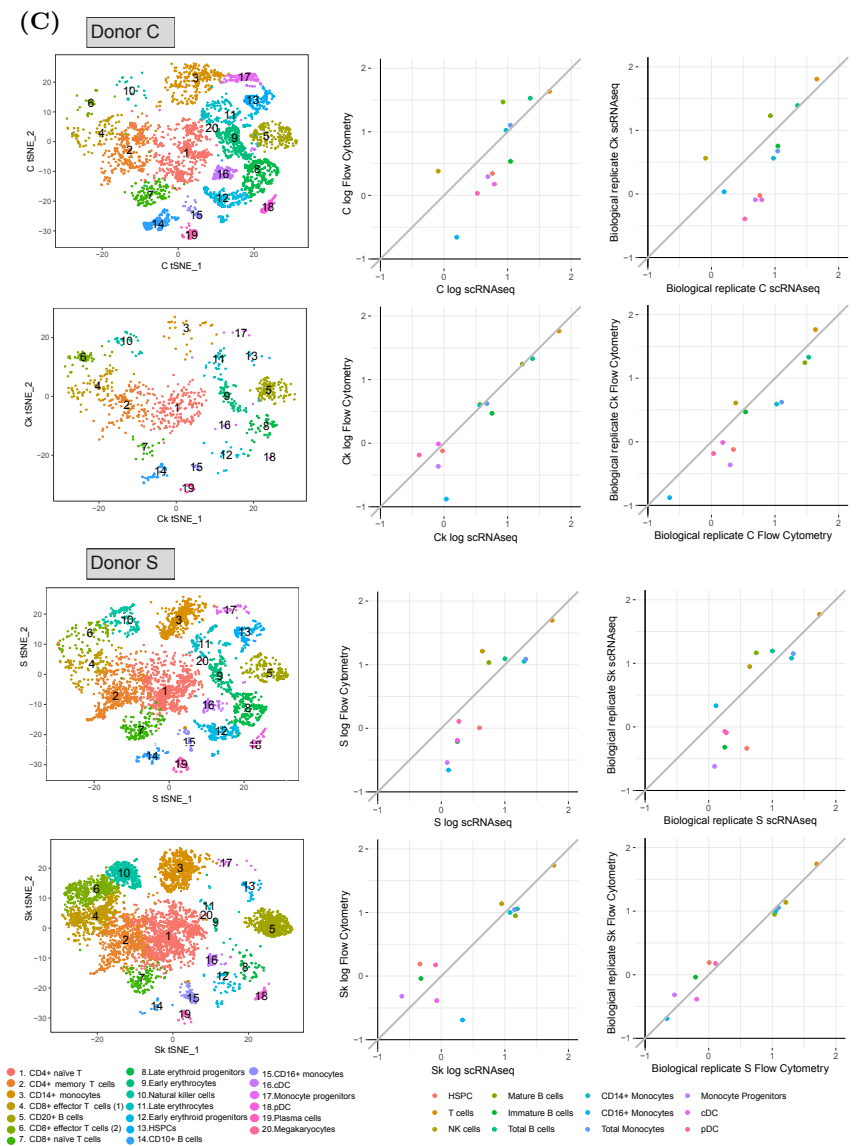

**Figure S2: Flow Cytometry compared with Single Cell RNA Sequencing** (A) Median frequency of major cell subsets in human bone marrow aspirate assessed by single-cell RNA sequencing (scRNAseq) (left) or flow cytometry (right). Percentages are of CD45 positive cells. Red zone reflects medians do not add to 100%. Aspirate underwent ficoll isolation of mononuclear cells prior to assessment. Cell yields per marrow aspirate varied by subject. (B) Age associated differences in T cell population frequencies (C) Analysis of biological replicates. Two subjects had repeat marrow aspirations analyzed. Shown on left are tSNE plots of scRNAseq data. Cell population frequencies as determined by flow cytometry and scRNAseq at the same timepoint (center) or between two timepoints using the same modality (right).

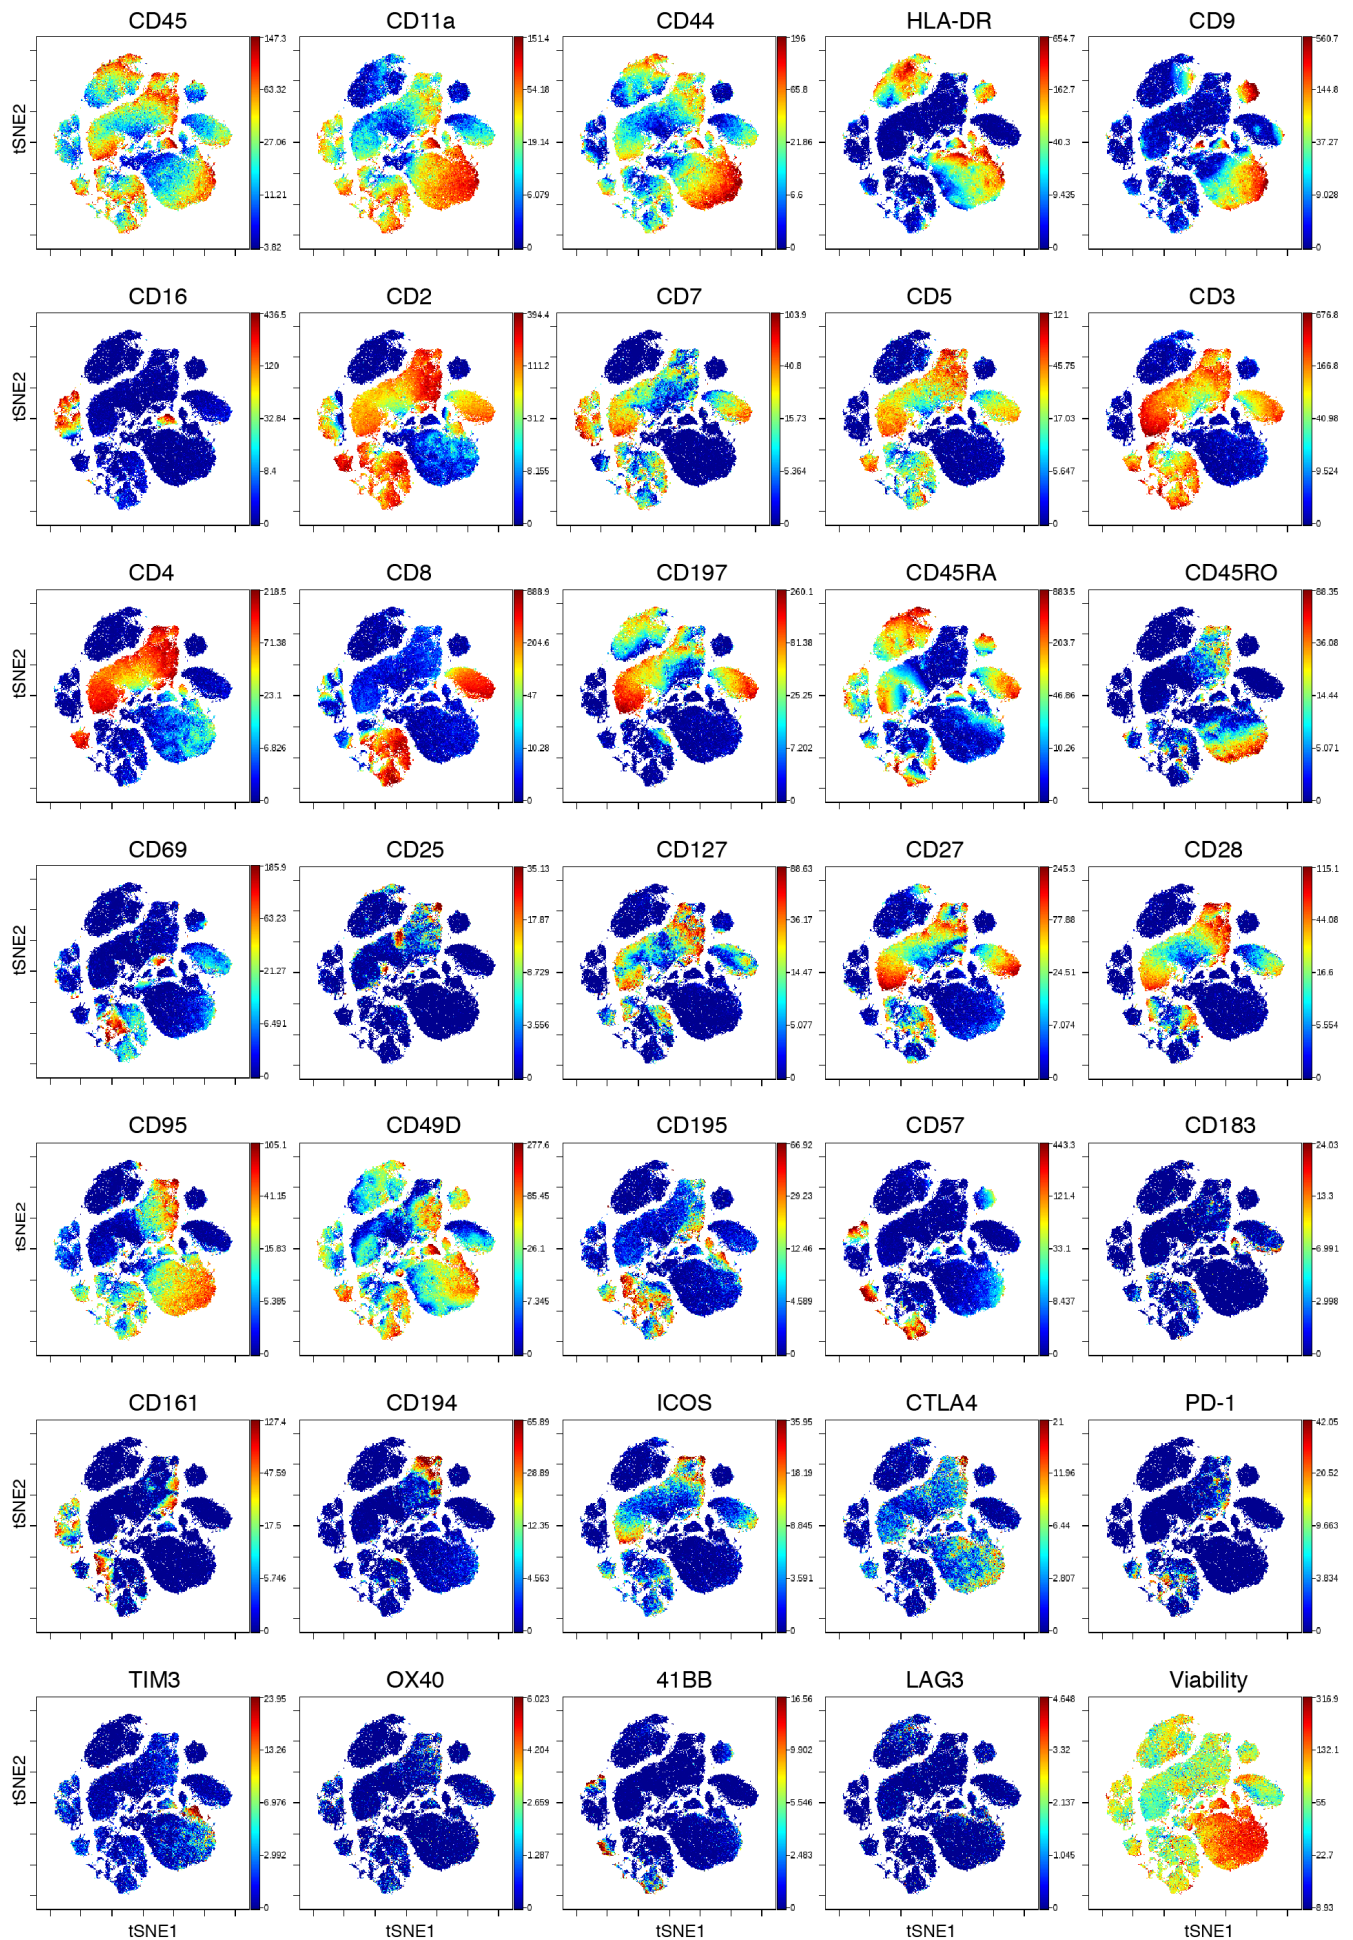

Figure S3: Mass Cytometry The viSNE visualization of CD45+ cells across the panel of markers.







**Table S1: 13-Color flow cytometry panel design**

| Laser           | Violet - 405nm     |           |                   |                  |        | Blue - 488nm            |                   | Green - 532nm |                   |        |                  | Red - 633nm |         |
|-----------------|--------------------|-----------|-------------------|------------------|--------|-------------------------|-------------------|---------------|-------------------|--------|------------------|-------------|---------|
| Detector        | V450               | V545      | V605              | V655             | V800   | B515                    | B710              | G560          | G610              | G660   | G780             | R660        | R780    |
| Fluorochrome    | Pac Blue/<br>BV421 | Aquablue  | BV 605            | BV 650           | BV 785 | FITC                    | PerCP/Cy5.5       | PE            | PE<br>Dazzle      | PE/Cy5 | PE/Cy7           | APC         | APC/Cy7 |
| T-cells         | CCR7               | Live/Dead | CD4               | CD45RA           | CD3    | CD27                    | CXCR4             | CD49b         | CD14/19           | CD69   | CD103            | CD95        | CD8     |
| B-cells         | CD80               | Live/Dead | CD27              | CD19             | CD45   | CD10                    | CD138             | PD-1          | CD20              | CD38   | CD86             | CD21        | CD40    |
| NK Cells        | CD7                | Live/Dead | CD335<br>(NKp46)  | CD314<br>(NKG2D) | CD45   | CD158e1<br>(KIR3DL1)    | CD226<br>(DNAM-1) | PD-1          | CD16              | CD69   | CD56             | NKG2C       | CD3     |
| Monocytes       | CD15               | Live/Dead | CD33              | HLA-DR           | CD45   | Lineage<br>(3,19,56)    | CD14              | PD-L1         | CD16              | CD11b  | CD124            | CD64        | CD13    |
| Dendritic Cells | CD123              | Live/Dead | CD141<br>(BDCA-3) | HLA-DR           | CD45   | Lineage<br>(3,14,16,19) | CD34              | PD-L1         | CD303<br>(BDCA-2) | CD11c  | CD1c<br>(BDCA-1) | CD117       | CD40    |

| Marker        | Fluorochrome | Clone    | Cat #  | Company        | Marker            | Fluorochrome | Clone       | Cat #       | Company        |
|---------------|--------------|----------|--------|----------------|-------------------|--------------|-------------|-------------|----------------|
| <b>BDCA-1</b> | PE/Cy7       | L161     | 331516 | Biologend      | <b>CD27</b>       | FITC         | O323        | 302806      | Biologend      |
| <b>BDCA-2</b> | PE Dazzle    | 201A     | 354226 | Biologend      | <b>CD3</b>        | BV785        | OKT3        | 317330      | Biologend      |
| <b>CCR7</b>   | BV421        | G043H7   | 353208 | Biologend      | <b>CD3</b>        | FITC         | OKT3        | 317306      | Biologend      |
| <b>CD10</b>   | FITC         | H110a    | 312208 | Biologend      | <b>CD3</b>        | APC/Cy7      | OKT3        | 317342      | Biologend      |
| <b>CD103</b>  | PE/Cy7       | Ber-ACT8 | 350212 | Biologend      | <b>CD314</b>      | BV650        | 1D11        | 563408      | BD Biosciences |
| <b>CD117</b>  | APC          | 104D2    | 313206 | Biologend      | <b>CD33</b>       | BV605        | P67.6       | 366612      | Biologend      |
| <b>CD11b</b>  | PE/Cy5       | ICRF44   | 301308 | Biologend      | <b>CD335</b>      | BV605        | 9E+2        | 331926      | Biologend      |
| <b>CD11c</b>  | PE/Cy5       | 3.9      | 301610 | Biologend      | <b>CD34</b>       | PerCP/Cy5.5  | 581         | 343522      | Biologend      |
| <b>CD123</b>  | BV421        | 6H6      | 306018 | Biologend      | <b>CD38</b>       | PE/Cy5       | HIT2        | 303508      | Biologend      |
| <b>CD124</b>  | PE/Cy7       | G077F6   | 355008 | Biologend      | <b>CD4</b>        | BV605        | OKT4        | 317438      | Biologend      |
| <b>CD13</b>   | APC/Cy7      | WM15     | 301710 | Biologend      | <b>CD40</b>       | APC/Cy7      | 5C3         | 334324      | Biologend      |
| <b>CD138</b>  | PerCP/Cy5.5  | M15      | 356510 | Biologend      | <b>CD45</b>       | BV785        | H130        | 304048      | Biologend      |
| <b>CD14</b>   | FITC         | M5E2     | 301804 | Biologend      | <b>CD45RA</b>     | BV650        | H1100       | 304136      | Biologend      |
| <b>CD14</b>   | PerCP/Cy5.5  | HCD14    | 325622 | Biologend      | <b>CD49b</b>      | PE           | P1E6-C5     | 359308      | Biologend      |
| <b>CD14</b>   | PE Dazzle    | M5E2     | 301852 | Biologend      | <b>CD56</b>       | FITC         | 5.1H11      | 362546      | Biologend      |
| <b>CD141</b>  | BV605        | M80      | 344118 | Biologend      | <b>CD56</b>       | PE/Cy7       | 5.1H11      | 362510      | Biologend      |
| <b>CD15</b>   | BV421        | W6D3     | 323040 | Biologend      | <b>CD64</b>       | APC          | 10.1        | 305014      | Biologend      |
| <b>CD158</b>  | FITC         | DX9      | 312706 | Biologend      | <b>CD69</b>       | PE/Cy5       | FN50        | 310908      | Biologend      |
| <b>CD16</b>   | FITC         | 3G8      | 302006 | Biologend      | <b>CD7</b>        | eFluor® 450  | eBio124-1D1 | 48-0079-42  | eBioscience    |
| <b>CD16</b>   | PE Dazzle    | 3G8      | 302054 | Biologend      | <b>CD8</b>        | APC/Fire     | SK1         | 344746      | Biologend      |
| <b>CD19</b>   | BV650        | SJ25C1   | 563226 | BD Biosciences | <b>CD80</b>       | BV421        | 2D10        | 305222      | Biologend      |
| <b>CD19</b>   | BV650        | SJ25C1   | 363026 | Biologend      | <b>CD86</b>       | PE/Cy7       | IT2.2       | 305422      | Biologend      |
| <b>CD19</b>   | FITC         | HIB19    | 302206 | Biologend      | <b>CD95 (Fas)</b> | APC          | DX2         | 305612      | Biologend      |
| <b>CD19</b>   | PE Dazzle    | HIB19    | 302252 | Biologend      | <b>CXCR4</b>      | PerCP/Cy5.5  | 12G5        | 306516      | Biologend      |
| <b>CD20</b>   | PE Dazzle    | 2H7      | 302348 | Biologend      | <b>HLA-DR</b>     | BV650        | L243        | 307650      | Biologend      |
| <b>CD21</b>   | APC          | Bu32     | 354906 | Biologend      | <b>NKG2C</b>      | APC          | REA205      | 130-103-636 | Miltenyi       |
| <b>CD226</b>  | PerCP/Cy5.5  | 11A8     | 338314 | Biologend      | <b>PD-1</b>       | PE           | MIH4        | 12-9969-42  | eBioscience    |
| <b>CD27</b>   | BV605        | O323     | 302830 | Biologend      | <b>PD-L1</b>      | PE           | 29E.2A3     | 329706      | Biologend      |

**Table S2: Flow cytometry gating strategy**

| <u>Cell population</u>            | <u>Flow cytometry gating</u>                                |
|-----------------------------------|-------------------------------------------------------------|
| B cells                           | CD45+ CD19+                                                 |
| Immature B cells                  | CD45+ CD19+ CD10+                                           |
| Pre-B cell (CD20-)                | CD45+ CD19+ CD20- CD10+                                     |
| Immature B cells (CD20+)          | CD45+ CD19+ CD20+ CD10+                                     |
| Translational B cells             | CD45+ CD19+ CD20+ CD10+ CD27-                               |
| Mature B cells                    | CD45+ CD19+ CD20+ CD10-                                     |
| Naïve Mature B cells              | CD45+ CD19+ CD20+ CD10- CD27- CD21hi                        |
| Exhausted/Tissue-like Memory      | CD45+ CD19+ CD20+ CD10- CD27- CD21lo                        |
| Memory B cells                    | CD45+ CD19+ CD20+ CD10- CD27+                               |
| Activated Mature                  | CD45+ CD19+ CD20+ CD10- CD27+ CD21lo                        |
| Resting Memory                    | CD45+ CD19+ CD20+ CD10- CD27+ CD21hi                        |
| CD20- CD10-                       | CD45+ CD19+ CD20- CD10-                                     |
| Plasmablast                       | CD45+ CD19+ CD20- CD10- CD27+ CD38+                         |
| Plasma Cell                       | CD45+ CD19+ CD20- CD10- CD27+ CD38+ CD138+                  |
| pDC                               | CD45+CD11c-CD123+                                           |
| cDC                               | CD45+CD3-CD14-CD16-CD19-HLA-DR+CD11c+                       |
| cDC1                              | CD45+CD3-CD14-CD16-CD19-HLA-DR+CD11c+CD141+                 |
| CD1c+ DC                          | CD45+CD3-CD14-CD16-CD19-HLA-DR+CD11c+CD141-CD1c+            |
| cDC2                              | CD45+CD3-CD14-CD16-CD19-HLA-DR+CD11c+CD141-CD1c-            |
| HSPC                              | CD45+CD34+                                                  |
| Monoblast/myeloblast/promyelocyte | CD45+CD3-CD14-CD16-CD19-CD34+HLA-DR+CD117+                  |
| Monocytes                         | CD45+CD3-CD19-CD56-CD33+CD13+CD11B+HLA-DR+CD64+             |
| CD14+ Monocytes                   | CD45+CD3-CD19-CD56-CD33+CD13+CD11B+HLA-DR+CD64+CD14+        |
| Classical Monocytes               | CD45+CD3-CD19-CD56-CD33+CD13+CD11B+HLA-DR+CD64+CD14+CD16-   |
| Intermediate Monocytes            | CD45+CD3-CD19-CD56-CD33+CD13+CD11B+HLA-DR+CD64+CD14+CD16int |
| Non-classical Monocytes           | CD45+CD3-CD19-CD56-CD33+CD13+CD11B+HLA-DR+CD64+CD14intCD16+ |
| NK cells                          | CD45+ CD3- CD7+ CD56+                                       |
| Immunoregulatory NK               | CD45+ CD3- CD7+ CD56bright CD16 dim                         |
| Cytotoxic NK                      | CD45+ CD3- CD7+ CD56dim CD16 bright                         |
| CD3+                              | CD45+ CD3+                                                  |
| CD8+                              | CD3+CD14-CD19-CD8+                                          |
| CD8+ CCR7+                        | CD3+CD14-CD19-CD8+CCR7+                                     |
| CD8+ Naïve                        | CD3+CD14-CD19-CD8+CCR7+CD45RA+                              |
| CD8+ CM                           | CD3+CD14-CD19-CD8+CCR7+CD45RA-                              |
| CD8+ CCR7-                        | CD3+CD14-CD19-CD8+CCR7-                                     |
| CD8+ TEMRA                        | CD3+CD14-CD19-CD8+CCR7-CD45RA+                              |
| CD8+ EM                           | CD3+CD14-CD19-CD8+CCR7-CD45RA-                              |
| CD8+ EM CD69+                     | CD3+CD14-CD19-CD8+CCR7-CD45RA-CD69+                         |
| CD8+ EM CD69+ CD103+              | CD3+CD14-CD19-CD8+CCR7-CD45RA-CD69+CD103+                   |
| CD4+                              | CD3+CD14-CD19-CD4+                                          |
| CD4+ CCR7+                        | CD3+CD14-CD19-CD4+CCR7+                                     |
| CD4+ Naïve                        | CD3+CD14-CD19-CD4+CCR7+CD45RA+                              |
| CD4+ CM                           | CD3+CD14-CD19-CD4+CCR7+CD45RA-                              |
| CD4+ CCR7-                        | CD3+CD14-CD19-CD4+CCR7-                                     |
| CD4+ TEMRA                        | CD3+CD14-CD19-CD4+CCR7-CD45RA+                              |
| CD4+ EM                           | CD3+CD14-CD19-CD4+CCR7-CD45RA-                              |
| CD4+ EM CD69+                     | CD3+CD14-CD19-CD4+CCR7-CD45RA-CD69+                         |
| CD4+ EM CD69+ CD103+              | CD3+CD14-CD19-CD4+CCR7-CD45RA-CD69+CD103+                   |
| DPT                               | CD3+CD14-CD19-CD4+CD8+                                      |
| DNT                               | CD3+CD14-CD19-CD4-CD8-                                      |

**Table S3: Bulk RNA-seq deconvolution**

See attached Excel spreadsheet



**Table S4: Flow cytometry instrument configuration**

**BD LSR Fortessa SORP Instrument configuration with HTS**

| Laser                   | Laser Wave Length | LASER Type and Source | Laser Power | Detector name           | Fluorochrome detected                                 | Dichroic LP Filter | BP filter | Signal Collected      | Signal Amplification | PMT        |
|-------------------------|-------------------|-----------------------|-------------|-------------------------|-------------------------------------------------------|--------------------|-----------|-----------------------|----------------------|------------|
| BLUE LASER LINE         | 488nm             | DPSS; Coherent        | 100 mW      | FSC                     | Forward Scatter                                       | NA                 | NA        | Hight, Area and Width | Linear               | PhotoDiode |
|                         |                   |                       |             | B710                    | PerCP CY5.5                                           | 685                | 710/50    | Area                  | Log                  | A          |
|                         |                   |                       |             | B515                    | FITC                                                  | 505                | 515/20    | Area                  | Log                  | B          |
|                         |                   |                       |             | SSC                     | Side Scatter                                          | 488                |           | Hight, Area and Width | Linear               | C          |
| GREEN LASER LINE        | 532nm             | DPSS; Coherent        | 150 mW      | G780                    | PECy7                                                 | 740                | 780/40    | Area                  | Log                  | A          |
|                         |                   |                       |             | G710                    |                                                       | 690                | 710/50    | Area                  | Log                  | B          |
|                         |                   |                       |             | G660                    | PECy5                                                 | 640                | 660/40Δ   | Area                  | Log                  | C          |
|                         |                   |                       |             | G610                    | PECF594                                               | 600                | 610/20    | Area                  | Log                  | D          |
|                         |                   |                       |             | G560                    | PE                                                    | empty              | 575/25    | Area                  | Log                  | E          |
| RED LASER LINE          | 637nm             | DPSS; OBIS            | 140 mW      | R780                    | APC-Cy7                                               | 740                | 780/60    | Area                  | Log                  | A          |
|                         |                   |                       |             | R710                    | APC-700                                               | 685                | 710/50    | Area                  | Log                  | B          |
|                         |                   |                       |             | R660                    | APC or AF-647                                         | empty              | 660/20Δ   | Area                  | Log                  | C          |
| VIOLET LASER LINE       | 405nm             | DPSS; OBIS            | 100 mW      | V800                    | BV786                                                 | 740                | 780/60    | Area                  | Log                  | A          |
|                         |                   |                       |             | <i>V705<sup>v</sup></i> |                                                       | 670                | 705/70    | Area                  | Log                  | B          |
|                         |                   |                       |             | V655                    | BV650                                                 | 630                | 660/40    | Area                  | Log                  | C          |
|                         |                   |                       |             | V605                    | BV605                                                 | 595                | 605/40    | Area                  | Log                  | D          |
|                         |                   |                       |             | <i>V585<sup>v</sup></i> |                                                       | 570                | 585/42    | Area                  | Log                  | E          |
|                         |                   |                       |             | V565                    |                                                       | 557                | 560/40    | Area                  | Log                  | F          |
|                         |                   |                       |             | V545                    | Fixable Live Dead Yellow viability stain (Invitrogen) | 535                | 560/40    | Area                  | Log                  | G          |
|                         |                   |                       |             | V450                    | BV421 or Pacific Blue                                 | empty              | 450/50    | Area                  | Log                  | H          |
| ULTRA VIOLET LASER LINE | 355nm             | DPSS; Genesis 355-100 | 45mW        | UV525                   | BUV 496                                               | 505                | 525/50Δ   | Area                  | Log                  | A          |
|                         |                   |                       |             | UV450                   | BUV 395                                               | empty              | 450/50    | Area                  | Log                  | B          |

Notch Filter: *A*

*v*: Not used in configuration.

Equipped with High Throughput Sampler System (HTS) (BD)

DPSS = Diode Pumped Solid State

**Table S5: Mass cytometry panel design**

| <b>Marker</b>  | <b>Metal</b> | <b>Clone</b> |
|----------------|--------------|--------------|
| CD11a          | 142Nd        | HI111        |
| CD4            | 145Nd        | RPA-T4       |
| CD8a           | 146Nd        | RPA-T8       |
| CD16           | 148Nd        | 3G8          |
| CD25           | 149Sm        | 2A3          |
| CD45           | 154Sm        | HI30         |
| CCR7           | 159Tb        | G043H7       |
| CD69           | 162Dy        | FN50         |
| CD45RO         | 165Ho        | UCHL1        |
| CD44           | 166Er        | BJ18         |
| CD27           | 167Er        | O323         |
| CD45RA         | 169Tm        | HI100        |
| CD3            | 170Er        | UCHT1        |
| CD57           | 172Yb        | HCD57        |
| HLA-DR         | 174Yb        | L243         |
| CD127          | 176Yb        | A019D5       |
| CD134 [OX40]   | 150Nd        | ACT35        |
| CD95 [Fas]     | 152Sm        | DX2          |
| CD366 [Tim-3]  | 153Eu        | F38-2E2      |
| CD279 [PD-1]   | 155Gd        | EH12.2H7     |
| CD152 [CTLA-4] | 161Dy        | 14D3         |
| CD278 [ICOS]   | 168Er        | C398.4A      |
| CD137 [4-1BB]  | 173Yb        | 4B4-1        |
| CD223 [LAG3]   | 175Lu        | 11C3C65      |
| CD2            | 151Eu        | TS1/8        |
| CD5            | 143Nd        | UCHT2        |
| CD7            | 147Sm        | CD7-6B7      |
| CD9            | 171Yb        | SN4 C3-3A2   |
| CD28           | 160Gd        | CD28.2       |
| CD49d          | 141Pr        | 9F10         |
| CD161          | 164Dy        | HP-3G10      |
| CCR4           | 158Gd        | L291H4       |
| CCR5           | 144Nd        | NP-6G4       |
| CXCR3          | 156Gd        | G025H7       |

**Fluidigm Maxpar Complete Human T Cell Immuno-Oncology Panel Set (Product # 201322)**

From: <https://www.fluidigm.com/reagents/proteomics/201322-maxpar-complete-human-t-cell-immuno-oncology-panel-set> (accessed October 18<sup>th</sup> 2018)
